# Supplementary material for: Stereoselective synthesis of individual isomers of Leu-enkephalin analogues containing substituted β-turn bicyclic dipeptide mimetics
Source: Royal Society of Chemistry journal article supplement (doi:10.1039/b302235h), 2003-01-01
Supplement: b302235h.doc [file b302235h.doc]

**Supplementary Information**

## Experimental Section

**General.** 1H and 13C NMR spectra were recorded on a Varian 300 MHz, DRX 500 and DRX 600 spectrometers. The chemical shifts were expressed in ppm(d) downfield from tetramethylsilane as an internal standard. Mass spectral analyses were conducted by Department of Chemistry, University of Arizona Mass Spectrum Laboratory. Optical rotations were measured on a JACSO P1020 polarimeter. Column chromatography was performed with 200-400 mesh size silica gel which was purchased from Aldrich Chemical Co. Thin layer chromatography (TLC) was performed with Kodak F-254 silica gel plates. b-Phenyl cysteine derivative (2*R*, 3*S*)-**2a**, and ( 2*S*, 3*R*)-**2b** were prepared according to our new protocol.6 The doubly protected glutamic acid g-aldehyde **1** was prepared according to a procedure previously described.5a Amino acids: Boc-Tyr-OH, H-Leu-OMe and H-Gly-OMe; Coupling reagents: BOP (benzotriazol-1-yloxy-tris(dimethylamino) phosphonium-hexafluorophosphate) and HOBt were obtained from Advanced Chemicals. All other chemicals were purchases from Aldrich Chemical Co. and used as received. The crude peptides were purified by RP-HPLC on a 10um Vydac C18 Column (1.0 25cm) with a 45 min gradient of 10-55% MeCN in 0.1% TFA at a flow rate of 3mL/min. the purity of the final compounds was checked by HPLC. HPLC *tR* were determined in a solvent system of 10% CH3CN in 0.1% TFA and a gradient to 90% CH3CN over 45 min. An analytical Vydac C18 column was used with a flow rate of 3mL/min. High-resolution mass spectra were determined by FAB-MS methods. Thin-layer chromatography (TLC) was performed on precoated plates of silica gel using the following system: (A) CHCl3/MeOH/AcOH (90:10:3; v/v/v). (B) n-BuOH/H2O/AcOH (4:1:1; v/v/v). (C) EtOAc/n-BuOH/H2O/AcOH (5:3:3:1; v/v/v/v). Ninhydrin reagent was used as a spray.

**Ethyl 2-Oxo-3-*N*-(phthalimido)amino-7-thio-8-phenyl-1-azabicyclo[4.3.0]nonane-9-carboxylate**(**3a**, **3b**, **3c**, **3d**). To a stirred solution of 1.90 g (5.26 mmol) of aldehyde **1** and 900 mg (11 mmol) of sodium acetate in 11 mL of 10:1 ethanol-water was added 340 mg (5.6 mmol) of acetic acid followed by 1.86 g ( 5.5 mmol) of -phenyl substituted cysteine ethyl ester trifluoroacetic acid (**2a** or **2b**). The brown solution was stirred at ambient temperature for 4 h, and the solvent was removed by rotary evaporation. The residue was dissolved in CH2Cl2 and washed with 0.2M HCl, and the aqueous phase was back-extracted with ethyl acetate. The combined organic extracts were washed sequentially with dilute aqueous NaHCO3 and brine; then concentrated under reduced pressure. The crude product was filtered through silica gel to give a mixture of diastereomers. This crude product was dissolved in 25 mL of DMF and treated with 1.31 g (7.7 mmol) of benzyltrimethylammonium fluoride. The solution was stirred at ambient temperature for 4 h and then concentrated. The residue was taken up in CH2Cl2 and washed with 0.1M HCl. The phases were separated, and the aqueous phase was extracted with CH2Cl2. The combined organic extracts were dried in MgSO4, concentrated and re-dissolved in 50 mL DMF. To a stirred solution was added 1.19 g DCC (5.79 mmol) and 0.74 g HOBt (5.79 mmol). The mixture was stirred at room temperature for 24h. After filtration, the solvent was removed under reduced pressure with a rotary evaporator. The crude products were purified by silica gel chromatography with hexanes-ethyl acetate (70:30 v/v) to afford **3a**, **3b** (0.9g, 0.51 g, 60%) or **3c**, **3d** (0.74g, 0.47 g, 55%); **3a**: []D24= +68.7 (*c* 1.10. CHCl3); 1H NMR (500MHz, CDCl3)  0.79 (t, *J* = 7.5 Hz, 3H), 2.25-2.60 (m, 4H), 3.59 (m, 1H), 3.82 (m, 1H), 4.97 (t, *J* = 4.2 Hz, 1H), 5.17 (d, *J* = 8.0 Hz, 1H), 5.74 (d, *J* = 8.0 Hz, 1H), 5.78 (m, 1H), 7.29-7.90 (m, 9H); 13C NMR (300MHz, CDCl3); 13.4, 24.6, 27.3, 47.9, 51.1, 61.1, 62.5, 65.6, 123.5, 128.3, 128.4, 128.6, 131.9, 134.2, 135.9, 161.5, 167.7, 168.2 HRMS (FAB) calcd for C24H23O5N2S (M+H) 451.1328, found 451.1318. **3b**: []D24 = +68.7 (*c* 1.10. CHCl3); 1H NMR (500MHz, CDCl3)  0.75 (t, *J* = 7.0 Hz, 3H), 2.29-2.56 (m, 4H), 3.45 (m, 1H), 3.71 (m, 1H), 4.87 (d, *J* = 7.5 Hz, 1H), 4.94(dd, *J1* = 12, *J2* = 7 Hz, 1H), 5.07 (d, *J* = 8.0 Hz, 1H), 5.29 (dd, *J1* = 11.5, *J2* = 3.5 Hz, 1H), 7.33-7.87 (m, 9H); 13C NMR (300MHz, CDCl3) 13.4, 26.2, 27.5, 48.8, 52.3, 60.8, 63.9, 66.5, 123.4, 128.4, 128.5, 128.7, 131.9, 132.9, 134.1,164.6, 167.3, 167.5; HRMS (FAB) calcd for C24H23O5N2S (M+H) 451.1328, found 451.1314. **3c**: []D24 = -103 (*c* 0.85. CHCl3); 1H NMR (300MHz, CDCl3)  0.75 (t, *J* = 7.2 Hz, 3H), 1.97-2.65 (m, 4H), 3.59 (m, 1H), 3.76 (m, 1H), 4.84 (dd, *J1* = 12, *J2* = 6.3 Hz, 1H), 5.02(d, *J* = 8.7 Hz, 1H), 5.49 (d, *J* = 8.4 Hz, 1H), 5.79 (dd, *J1* = 11.4, *J2* = 3.9 Hz, 1H), 7.23-7.84 (m, 9H); 13C NMR (300MHz, CDCl3) 13.3, 25.9, 29.9, 49.1, 50.6, 61.1, 62.9, 65.8, 123.5, 128.3, 128.7, 132.0, 134.0, 136.0, 164.6, 167.3, 167.7;HRMS (FAB) calcd for C24H23O5N2S (M+H) 451.1328, found 451.1330. **3d**: []D24 = +31.8 (*c* 4.25. CHCl3); 1H NMR (300MHz, CDCl3)  0.76 (t, *J* = 76.9 Hz, 3H), 2.22-2.68 (m, 4H), 3.62 (m, 1H), 3.79 (m, 1H), 4.75 (d, *J* = 6.9 Hz, 1H), 4.90(dd, *J1* = 9.9, *J2* = 6.3 Hz, 1H), 4.97 (d, *J* = 7.2 Hz, 1H), 5.09 (dd, *J1* = 10.5, *J2* = 3 Hz, 1H), 7.22-7.77 (m, 9H); 13C NMR (300MHz, CDCl3) 16.2, 18.5, 37.5, 42.8, 51.8, 52.8, 57.9, 67.3, 67.8, 68.2, 114.2, 119.1, 119.5, 122.7,123.4, 124.7, 156.2, 157.8, 158.2;HRMS (FAB) calcd for C24H23O5N2S (M+H) 451.1328, found 451.1329.

**H-Tyr-Gly**-**[(3*S*, 6*R*, 8*S*, 9*R*)-8-phenyl–BTD]-Leu-OH (6a)**

The peptides were prepared by modified standard solution peptide synthesis methods. A solution of compound **3a** (50 mg, 0.11 mmol) in 3 mL of DCM was treated at -10° C with 1M BBr3 (0.55 mL, 0.55 mmol, 5 equiv). The reaction was quenched by adding 0.5 mL water after warmed up to room temperature for 2 h. The organic phase was washed with water (3´10 mL) and brine, dried over MgSO4 and evaporated to dryness. The crude product was dissolved in 3 mL of DMF. The solution was stirred under an atmosphere of dry nitrogen and BOP (53 mg, 0.12 mmol, 1.1 equiv), HOBt (16.4 mg, .12 mmol, 1.1 equiv), DIPEA (42.6 mg, 0.33 mmol, 3 equiv) and H-Leu-OMe·HCl (18 mg, 0.01 mmol, 0.9 equiv) were added sequentially. The mixture was allowed to stand overnight at room temperature, then concentrated. The residue was redissolved in 5 mL of ethyl acetate and washed successively with 10% aqueous citric acid (3´10 mL), water (3´10 mL), 10% aqueous sodium bicarbonate (3´10 mL) and brine. The resulting organic phase was dried over MgSO4 and evaporated to dryness, yielding 40 mg (66%) of the intermediate Pht(Phe-BTD)-Leu-OMe.

To a stirred solution of 40 mg (0.073 mmol) of intermediate Pht(Phe-BTD)-Leu-OMe in 200L of CHCl3 and 2.4 mL of 95% ethanol was added 17 L(0.53 mmol) of anhydrous hydrazine. The solution was stirred at room temperature for 18 h and filtered. This solution was concentrated and redissolved in 5 mL of ethyl acetate and washed successively with 10% aqueous sodium bicarbonate (3´10 mL) and brine. The resulting organic phase was dried over MgSO4 and evaporated to dryness. The residue was dissolved in 5 mL of THF and 47 mg (0.22 mmol, 3equiv) of *di-tert*-butyl-dicarbonate and 30 L triethylamine (0.22 mmol, 3equiv) was added. The reaction was stirred overnight at room temperature, then concentrated. The residue was redissolved in 5 mL of ethyl acetate and washed successively with 10% aqueous citric acid (3´10 mL), water (3´10 mL), 10% aqueous sodium bicarbonate (3´10 mL) and brine. The resulting organic phase was dried over MgSO4 and evaporated to dryness. The crude product was purified by column chromatography with ethyl actate /hexane (1:1) to afford the Boc protected tripeptide **4a**.

The tripeptide **4a** was treated with 50% TFA in DCM at 0°C for 20 min. The solvent was evaporated off and the residue was dissolved in 2mL of DMF. This solution was stirred under an atmosphere of dry nitrogen and BOP (35 mg, 0.08 mmol, 1.1 equiv), HOBt (11 mg, 0.08 mmol, 1.1 equiv), DIPEA (28 mg, 0.22 mmol, 3 equiv) and Boc-Tyr-Gly-OH (28 mg, 0.08 mmol, 1.0 equiv) were added sequentially. The mixture was allowed to stand overnight at room temperature, then concentrated. The residue was redissolved in 5 mL of ethyl acetate and washed successively with 10% aqueous citric acid (3´10 mL), water (3´10 mL), 10% aqueous sodium bicarbonate (3´10 mL) and brine. The resulting organic phase was dried over MgSO4 and evaporated to dryness, yielding 40 mg (74%) of the *Na*-Boc protected peptide **5a**.

The peptide **5a** (40 mg, 0.054 mmol) was dissolved in 3 mL of DCM and treated at -10°C with 1M BBr3 (0.27 mL, 0.27 mmol, 5 equiv) for 4h. After the reaction was quenched by adding 0.5 mL water, the organic phase was washed with water (3´10 mL) and brine, dried over MgSO4 and evaporated to dryness. The residue was dissolved in 20% MeCN in 0.1% TFA and purified by RP-HPLC to give the title compound (6.2 mg, 9%). R*f* (A) = 0.036, R*f* (B) = 0.59, R*f* (C) = 0.31, HPLC t*R* = 19.6 min. FAB-MS calcd for C31H40O7N5S [M+H] = 626.2648, found: 626.2660.

**H-Tyr-Gly**-**[(3*S*, 6*S*, 8*S*, 9*R*)-8-phenyl–BTD]-Leu-OH (6b)**

Compound **3b** was converted to the titled compound using the same methodology used in the preparation of **6a** (5.2 mg, 12%). R*f* (A) = 0.052, R*f* (B) = 0.71, R*f* (C) = 0.41, HPLC t*R* = 17.2 min. FAB-MS calcd for C31H40O7N5S [M+H] = 626.2648, found: 626.2667.

**H-Tyr-Gly**-**[(3*S*, 6*R*, 8*R*, 9*S*)-8-phenyl–BTD]-Leu-OH (6c)**

Compound **3c** was converted to the titled compound using the same methodology used in the preparation of **6a** (4.3 mg, 15%). R*f* (A) = 0.016, R*f* (B) = 0.77, R*f* (C) = 0.51, HPLC t*R* = 18.3 min. FAB-MS calcd for C31H40O7N5S [M+H] = 626.2648, found: 626.2628. 1H NMR (600MHz, DMSO);  0.83 (d, *J* = 6.6 Hz, 3H), 0.87 (d, *J* = 6.0 Hz, 3H), 1.50 (m, 2H), 1.65 (m, 2H), 2.11 (m, 2H), 2.22 (m, 1H), 2.81 (m, 1H), 2.99 (m, 1H), 3.84 (m, 2H), 3.98 (br, 1H), 4.20 (m, 1H), 4.65 (m, 2H), 4.94 (s, 1H), 5.19 (m, 1H), 6.69 (d, *J* = 8.4 Hz, 2H), 7.05 (d, *J* = 8.4 Hz, 2H), 7.27-7.38 (m, 5H), 8.05 (br, 3H), 8.18 (d, *J* = 7.8 Hz, 1H), 8.44 (d, *J* = 7.8 Hz, 1H), 8.69 (m, 1H), 9.35 (br, 1H).

**H-Tyr-Gly**-**[(3*S*, 6*S*, 8*R*, 9*S*)-8-phenyl–BTD]-Leu-OH (6d)**

Compound **3d** was converted to the titled compound using the same methodology used in the preparation of **6d**. (5.2 mg, 9%). R*f* (A) = 0.056, R*f* (B) = 0.76, R*f* (C) = 0.46, HPLC t*R* = 18.5 min. FAB-MS calcd for C31H40O7N5S [M+H] = 626.2648, found: 626.2667.

**GPI and MVD Bioassays.**

1. Mouse Isolated Vas Deferens Preparation

Male ICR mice under ether anesthesia were killed by cervical dislocation and the vasa deferentia removed. Tissues were tied to gold chains with suture silk and mounted between platinum wire electrodes in 20 ml organ baths at a tension of 0.5 g and bathed in oxygenated (95:5 O2:CO2) magnesium free Kreb's buffer at 37○C and stimulated electrically (0.1 Hz, single pulses, 2.0 msec duration) at supramaximal voltage as previously described (Porreca et al., 1990). Following an equilibration period, compounds were added to the bath cumulatively in volumes of 14-60 μL until maximum inhibition was reached. Response to an IC50 dose of DPDPE (10 nM) was measured to determine tissue integrity before analog testing.

1. Guinea Pig Isolated Ileum

Male Hartley guinea pigs under ether anesthesia were killed by decapitation and a non-terminal portion of the ileum removed. The longitudinal muscle with myenteric plexus (LMMP) was carefully separated from the circular muscle and cut into strips as described previously (Porreca and Burks, 1983). These tissues were tied to gold chains with suture silk and mounted between platinum wire electrodes in 20 ml organ baths at a tension of 1 g and bathed in oxygenated (95:5 O2:CO2) Kreb's bicarbonate buffer at 37○C and stimulated electrically (0.1 Hz, 0.4 msec duration) at supramaximal voltage. Following an equilibration period, compounds were added cumulatively to the bath in volumes of 14-60 μL until maximum inhibition was reached. Response to an IC50 dose of PL-017 (100 nM) was measured to determine tissue integrity before analogue testing began.

3. Antagonist testing

Compounds were tested for their antagonist activity by adding an IC50 dose of PL-017 in the GPI or DPDPE in the MVD to the bath after the final 1 uM dose of the test compounds. Blunting of the agonist effect of DPDPE or PL-017 indicated antagonist activity of the test compound.

4. Analysis

Percentage inhibition was calculated using the average tissue contraction height for 1 min preceding the addition of the agonist divided by the contraction height 3 min after exposure to the dose of agonist. IC50 values represent the mean of not less than 3 tissues. IC50 and Emax estimates were determined by computerized nonlinear least-squares analysis (MINSQ, Micromath).
